# Supplementary material
Source: publisher figshare collection journal article supplement (https://sage.figshare.com/ndownloader/files/23086277)
Supplement: Supplementary file 1 [file 23086277]

**Supplementary Table 1.** Primers used in study of nontypeable *Actinobacillus pleuropneumoniae* isolates.

| Primer name       | Sequence (5'–3')                 | Target gene               | Amplicon size (bp) |
|-------------------|----------------------------------|---------------------------|--------------------|
| cps15F1-30*       | ATGAAAAAAGTATATGTAACGCACGGTTAT   | First half of CPS locus   | 8,706              |
| cps15R1-8706      | ATATCCCGCACCGCCTACAGTACCTAAAAA   |                           |                    |
| cps15F2-6556*     | CAACAAAACCAGAATACAATTCTATCGCTGCG | Second half of CPS locus  | 7,406              |
| cps15R2-13931     | ATGCCAAATATCAACATCCAGAACGCC      |                           |                    |
| lps15F1(1484)†    | ACTCGTAAACGAAGATTCGGGTATCTTCGC   | First half of O-PS locus  | 7,119              |
| lps15R1(1491)7018 | CTGCGGAAAATCTAGGTGTAAATGCGACAACC |                           |                    |
| lps15F2(1490)†    | CGTATTGGAAATCCTATCACTCAAGGGTTTGG | Second half of O-PS locus | 9,594              |
| lps15R2(1498)     | CGTGAAAAAGCATCTTTAGCTAAACGTCACGC |                           |                    |

CPS = capsular polysaccharide; O-PS = O-polysaccharide.

\* Primers for the amplification of the DNA fragments of the CPS locus were designed on the basis of the sequences of CPS locus of reference strain HS143 (serovar 15, accession MG868949).<sup>2</sup>

† Primers for amplification of the DNA fragments of the LPS locus were designed on the basis of the sequences of the O-PS loci of reference strain HS143 (accession AB743837)<sup>6</sup> and strain JL03 (serovar 3, accession CP000687).
